# Supplementary material for: Measurement of the molar mass of the 28Si-enriched silicon crystal (AVO28) with HR-ICP-MS
Source: Royal Society of Chemistry journal article supplement (doi:10.1039/c5ja00324e), 2015-01-01
Supplement: c5ja00324e1.xlsx [file c5ja00324e1.xlsx]

## Sheet: Equations
a.	K factors
b.	isotope ratio correction
	Ry=ry*K30
	Ry,28=ry,28*K28						Symbol	unit	Meaning
	Rx=rx*K30						M(28Si)	g/mol	Nuclide Mass of 28Si
	Rbx=rbx*K30						M(29Si)	g/mol	Nuclide Mass of 29Si
							M(30Si)	g/mol	Nuclide Mass of 30Si
c.	isotope abundance and molar mass						mz1	g	mass of 29Si material(Z) to prepare b1-1
							mz2	g	mass of 29Si material(Z) to prepare b2-1
	wy=(M(29Si)+Ry*M(30Si))/(Ry,28*M(28Si)+M(29Si)+Ry*M(30Si))						mw2	g	mass of WASO material(W) to prepare b2-1
							my1	g	mass of 30Si material(Y) to prepare b1-1
	wimp=wy*myx/mx*(M(29Si)+Rx*M(30Si))/(M(29Si)+Ry*M(30Si))*(Ry-Rbx)/(Rbx-Rx)						rb1	cps/cps	isotope ratio of 30Si /29Si in b1-1
							rz	cps/cps	isotope ratio of 30Si /29Si in 29Si solution(Z)
	xx(28Si)=((1-wimp)/M(28Si))/((1-wimp)/M(28Si)+(1+Rx)*wimp/(M(29Si)+Rx*M(30Si)))						rb2	cps/cps	isotope ratio of 28Si/29Si in b2-1
							rw	cps/cps	isotope ratio of 30Si/29Si in WASO solution(W)
	xx(29Si)=(wimp/(M(29Si)+Rx*M(30Si))/((1-wimp)/M(28Si)+(1+Rx)*wimp/(M(29Si)+Rx*M(30Si)))						ry	cps/cps	isotope ratio of 30Si/29Si in 30Si solution(Y)
							rw,28	cps/cps	isotope ratio of 28Si/29Si in WASO solution(W)
	xx(30Si)=(Rx*wimp/(M(29Si)+Rx*M(30Si))/((1-wimp)/M(28Si)+(1+Rx)*wimp/(M(29Si)+Rx*M(30Si)))						ry,28	cps/cps	isotope ratio of 28Si/29Si in 30Si solution(Y)
							rz,28	cps/cps	isotope ratio of 28Si/29Si in 29Si solution(Y)
	M=xx(28Si)*M(28Si)+xx(29Si)*M(29Si)+xx(30Si)*M(30Si)						K28		K factor of isotope ratios of 28Si/29Si
							K30		K factor of isotope ratios of 30Si/29Si
	MVE=xx(29Si)/(xx(29Si)+xx(30Si))*M(29Si)+xx(30Si)/(xx(29Si)+xx(30Si))*M(30Si)						rbx	cps/cps	isotope ratio of 30Si/29Si in spiked solution(YX)
							rx	cps/cps	isotope ratio of 30Si/29Si in AVO28(X)
							Ry	cps/cps	corrected isotope ratio of 30Si/29Si in 30Si solution(Y)
							Ry,28	cps/cps	corrected isotope ratio of 28Si/29Si in 30Si solution(Y)
							Rx	cps/cps	corrected isotope ratio of 30Si/29Si in 28Si solution(X)
							Rbx	cps/cps	corrected isotope ratio of 30Si/29Si in spiked solution(YX)
							wy	g/g	mass fraction of the virtual element (VE) in 30Si(Y)
							wimp	g/g	mass fraction of the virtual element (VE) in AVO28(X)
							myx	g	mass of 30Si material(Y) to prepare bx
							mx	g	mass of AVO28(X) to prepare bx
							x(28Si)	mol/mol	isotope abundance of 28Si in AVO28(X)
							x(29Si)	mol/mol	isotope abundance of 29Si in AVO28(X)
							x(30Si)	mol/mol	isotope abundance of 30Si in AVO28(X)
							M	g/mol	molar mass of AVO28(X)
							MVE	g/mol	molar mass of the virtual element (VE) in AVO28(X)

## Sheet: Data
								Nuclide Mass
				Constants	M28	g/mol	M(28Si, AME2012)	27.9769
					M29	g/mol	M(29Si, AME2012)	28.9765
					M30	g/mol	M(30Si, AME2012)	29.9738
				Measured Quantities
	Sample	Date		YZ				Z						WZ				Y						W						YX				X				mZ1		mZ2		mw2		my1		myx		mx
				29Si/cps	30Si/cps	rb1(30Si/29Si)		28Si/cps	29Si/cps	30Si/cps	rZ,28(28Si/29Si)	rZ(30Si/29Si)		28Si/cps	29Si/cps	rb2(28Si/29Si)		28Si/cps	29Si/cps	30Si/cps	ry,28(28Si/29Si)	ry(30Si/29Si)		28Si/cps	29Si/cps	30Si/cps	rw,28(28Si/29Si)	rw(30Si/29Si)		29Si/cps	30Si/cps	rbx(30Si/29Si)		29Si/cps	30Si/cps	rx(30Si/29Si)		/g		/g		/g		/g		/g		/g
		2014.06.23	Procedure blank	26487.4	7771.7			213515	10611.2	5982.5				177896	6829.6			127632	12986.5	15165.7				134451	9805.9	21404.5				4310.8	4841.9			4289.2	3090
			Sample solution	9.71293e+06	4.51073e+07	4.65594		1.04748e+06	5.46621e+07	143822	0.0152597	0.00252216		4.72551e+07	1.00704e+07	4.67797		507931	214327	5.52808e+07	1.88884	274.488		5.53647e+07	2.8585e+06	1.88631e+06	19.3879	0.654651		243162	1.58343e+06	6.60909		820240	24110.8	0.0257624		0.000899712		0.000780727		0.00503489		0.00431415		1.20062e-05		0.0410208
				29Si/cps	30Si/cps	rb1(30Si/29Si)		28Si/cps	29Si/cps	30Si/cps	rZ,28(28Si/29Si)	rZ(30Si/29Si)		28Si/cps	29Si/cps	rb2(28Si/29Si)		28Si/cps	29Si/cps	30Si/cps	ry,28(28Si/29Si)	ry(30Si/29Si)		28Si/cps	29Si/cps	30Si/cps	rw,28(28Si/29Si)	rw(30Si/29Si)		29Si/cps	30Si/cps	rbx(30Si/29Si)		29Si/cps	30Si/cps	rx(30Si/29Si)		/g		/g		/g		/g		/g		/g
		2013.09.29	Procedure blank	9231.9	5095.1			93887	5502	3166.4				90334.1	5648.6			90356.6	6308	5060.7				92536.6	5684.3	5863.3				5461.2	5059.6			5409.3	3701.1
			Sample solution	2.61237e+06	1.21013e+07	4.64676		348869	1.50841e+07	42151.3	0.0169101	0.00258544		1.23168e+07	2.59617e+06	4.71972		177624	62453.9	1.53368e+07	1.5543	273.069		1.49824e+07	773562	518662	19.391	0.667813		75958.8	476609	6.68886		234743	8818.47	0.0223141		0.000899712		0.000780727		0.00503489		0.00431415		1.20062e-05		0.0410208
				29Si/cps	30Si/cps	rb1(30Si/29Si)		28Si/cps	29Si/cps	30Si/cps	rZ,28(28Si/29Si)	rZ(30Si/29Si)		28Si/cps	29Si/cps	rb2(28Si/29Si)		28Si/cps	29Si/cps	30Si/cps	ry,28(28Si/29Si)	ry(30Si/29Si)		28Si/cps	29Si/cps	30Si/cps	rw,28(28Si/29Si)	rw(30Si/29Si)		29Si/cps	30Si/cps	rbx(30Si/29Si)		29Si/cps	30Si/cps	rx(30Si/29Si)		/g		/g		/g		/g		/g		/g
		2013.09.29	Procedure blank	7220.8	3113.6			93887	5502	3166.4				90215.7	4494.2			90356.6	6308	5060.7				92536.6	5684.3	5863.3				5461.2	5059.6			5409.3	3701.1
			Sample solution	7.80501e+06	7.11234e+06	0.911698		348869	1.50841e+07	42151.3	0.0169101	0.00258544		7.48907e+06	7.93445e+06	0.933026		177624	62453.9	1.53368e+07	1.5543	273.069		1.49824e+07	773562	518662	19.391	0.667813		75958.8	476609	6.68886		234743	8818.47	0.0223141		0.00301405		0.00240794		0.00240058		0.00277166		1.20062e-05		0.0410208
				29Si/cps	30Si/cps	rb1(30Si/29Si)		28Si/cps	29Si/cps	30Si/cps	rZ,28(28Si/29Si)	rZ(30Si/29Si)		28Si/cps	29Si/cps	rb2(28Si/29Si)		28Si/cps	29Si/cps	30Si/cps	ry,28(28Si/29Si)	ry(30Si/29Si)		28Si/cps	29Si/cps	30Si/cps	rw,28(28Si/29Si)	rw(30Si/29Si)		29Si/cps	30Si/cps	rbx(30Si/29Si)		29Si/cps	30Si/cps	rx(30Si/29Si)		/g		/g		/g		/g		/g		/g
		2013.06.08	Procedure blank	5916.88	6775.65			53715.3	2667.96	1748.47				38007.5	6003.76			44708.6	8281.71	1591.1				42713.6	4745.78	6651.64				1977.74	1653.3			1677.43	1315.77
			Sample solution	3989233	1.85115e+07	4.64555		450410	2.32708e+07	63981	0.0170488	0.00267458		1.92676e+07	4.06402e+06	4.73867		165208	84298.9	2.06501e+07	1.58516	271.629		2.43615e+07	1.29333e+06	863392	18.8726	0.664872		106008	686246	6.58071		278971	8266.76	0.0250673		0.000899712		0.000780727		0.00503489		0.00431415		1.20062e-05		0.0410208
				29Si/cps	30Si/cps	rb1(30Si/29Si)		28Si/cps	29Si/cps	30Si/cps	rZ,28(28Si/29Si)	rZ(30Si/29Si)		28Si/cps	29Si/cps	rb2(28Si/29Si)		28Si/cps	29Si/cps	30Si/cps	ry,28(28Si/29Si)	ry(30Si/29Si)		28Si/cps	29Si/cps	30Si/cps	rw,28(28Si/29Si)	rw(30Si/29Si)		29Si/cps	30Si/cps	rbx(30Si/29Si)		29Si/cps	30Si/cps	rx(30Si/29Si)		/g		/g		/g		/g		/g		/g
		2013.06.08	Procedure blank	5883.45	4978.24			53715.3	2667.96	1748.47				36431.5	6292.49			44708.6	8281.71	1591.1				42713.6	4745.78	6651.64				1977.74	1653.3			1677.43	1315.77
			Sample solution	7.89864e+06	1.45444e+07	1.84212		450410	2.32708e+07	63981	0.0170488	0.00267458		1.72789e+06	922901	1.84535		165208	84298.9	2.06501e+07	1.58516	271.629		2.43615e+07	1.29333e+06	863392	18.8726	0.664872		106008	686246	6.58071		278971	8266.76	0.0250673		0.00160125		0.00168067		0.0035947		0.00301031		1.20062e-05		0.0410208
				29Si/cps	30Si/cps	rb1(30Si/29Si)		28Si/cps	29Si/cps	30Si/cps	rZ,28(28Si/29Si)	rZ(30Si/29Si)		28Si/cps	29Si/cps	rb2(28Si/29Si)		28Si/cps	29Si/cps	30Si/cps	ry,28(28Si/29Si)	ry(30Si/29Si)		28Si/cps	29Si/cps	30Si/cps	rw,28(28Si/29Si)	rw(30Si/29Si)		29Si/cps	30Si/cps	rbx(30Si/29Si)		29Si/cps	30Si/cps	rx(30Si/29Si)		/g		/g		/g		/g		/g		/g
		2013.06.08	Procedure blank	3230.89	3132.75			53715.3	2667.96	1748.47				28641.1	6180.4			44708.6	8281.71	1591.1				42713.6	4745.78	6651.64				1977.74	1653.3			1677.43	1315.77
			Sample solution	1.19978e+07	1.09035e+07	0.908776		450410	2.32708e+07	63981	0.0170488	0.00267458		1.13509e+07	1.21461e+07	0.932647		165208	84298.9	2.06501e+07	1.58516	271.629		2.43615e+07	1.29333e+06	863392	18.8726	0.664872		106008	686246	6.58071		278971	8266.76	0.0250673		0.00301405		0.00240794		0.00240058		0.00277166		1.20062e-05		0.0410208
				Measured Quantities
	Sample	Date		YZ				Z						WZ				Y						W						YX				X				mZ1		mZ2		mw2		my1		myx		mx
				29Si/cps	30Si/cps	rb1(30Si/29Si)		28Si/cps	29Si/cps	30Si/cps	rZ,28(28Si/29Si)	rZ(30Si/29Si)		28Si/cps	29Si/cps	rb2(28Si/29Si)		28Si/cps	29Si/cps	30Si/cps	ry,28(28Si/29Si)	ry(30Si/29Si)		28Si/cps	29Si/cps	30Si/cps	rw,28(28Si/29Si)	rw(30Si/29Si)		29Si/cps	30Si/cps	rbx(30Si/29Si)		29Si/cps	30Si/cps	rx(30Si/29Si)		/g		/g		/g		/g		/g		/g
		2014.06.21	Procedure blank	25337.6	8135			178702	10906.9	6299.2				141633	7366.9			84629.7	12304.2	15780.6				96392.2	9603.3	33800.6				3979.5	2974.9			4441.5	3233.9
			Sample solution	1.00557e+07	4.68186e+07	4.66687		1.04333e+06	5.55151e+07	150139	0.0155776	0.00259152		4.61699e+07	9.90212e+06	4.65178		490668	225294	5.74799e+07	1.90637	269.797		5.68482e+07	2.95554e+06	1.98616e+06	19.2645	0.66273		267871	1758814	6.65364		913820	26189.9	0.0252436		0.000899712		0.000780727		0.00503489		0.00431415		1.19923e-05		0.040854
				29Si/cps	30Si/cps	rb1(30Si/29Si)		28Si/cps	29Si/cps	30Si/cps	rZ,28(28Si/29Si)	rZ(30Si/29Si)		28Si/cps	29Si/cps	rb2(28Si/29Si)		28Si/cps	29Si/cps	30Si/cps	ry,28(28Si/29Si)	ry(30Si/29Si)		28Si/cps	29Si/cps	30Si/cps	rw,28(28Si/29Si)	rw(30Si/29Si)		29Si/cps	30Si/cps	rbx(30Si/29Si)		29Si/cps	30Si/cps	rx(30Si/29Si)		/g		/g		/g		/g		/g		/g
		2013.09.17	Procedure blank	9401.9	4949.1			93183.8	6051.1	3202				97527.1	6885.8			81228.4	7347.2	7999.7				79743.7	5443.7	10007.6				4206.1	2921.7			4016.6	2810.5
			Sample solution	4.43222e+06	2.05945e+07	4.65531		514848	2.46654e+07	67364.6	0.0170996	0.00260196		2.01785e+07	4.25974e+06	4.72176		224508	97508.7	2.47768e+07	1.58914	274.716		2.42799e+07	1.26895e+06	851816	19.1532	0.666251		110801	713751	6.66851		349347	11240	0.0244099		0.000899712		0.000780727		0.00503489		0.00431415		1.19923e-05		0.040854
				29Si/cps	30Si/cps	rb1(30Si/29Si)		28Si/cps	29Si/cps	30Si/cps	rZ,28(28Si/29Si)	rZ(30Si/29Si)		28Si/cps	29Si/cps	rb2(28Si/29Si)		28Si/cps	29Si/cps	30Si/cps	ry,28(28Si/29Si)	ry(30Si/29Si)		28Si/cps	29Si/cps	30Si/cps	rw,28(28Si/29Si)	rw(30Si/29Si)		29Si/cps	30Si/cps	rbx(30Si/29Si)		29Si/cps	30Si/cps	rx(30Si/29Si)		/g		/g		/g		/g		/g		/g
		2013.09.17	Procedure blank	11308.5	3020.1			93183.8	6051.1	3202				103573	5241.1			81228.4	7347.2	7999.7				79743.7	5443.7	10007.6				4206.1	2921.7			4016.6	2810.5
			Sample solution	1.32059e+07	1.20157e+07	0.910423		514848	2.46654e+07	67364.6	0.0170996	0.00260196		1.18928e+07	1.26558e+07	0.931914		224508	97508.7	2.47768e+07	1.58914	274.716		2.42799e+07	1.26895e+06	851816	19.1532	0.666251		110801	713751	6.66851		349347	11240	0.0244099		0.00301405		0.00240794		0.00240058		0.00277166		1.19923e-05		0.040854
				29Si/cps	30Si/cps	rb1(30Si/29Si)		28Si/cps	29Si/cps	30Si/cps	rZ,28(28Si/29Si)	rZ(30Si/29Si)		28Si/cps	29Si/cps	rb2(28Si/29Si)		28Si/cps	29Si/cps	30Si/cps	ry,28(28Si/29Si)	ry(30Si/29Si)		28Si/cps	29Si/cps	30Si/cps	rw,28(28Si/29Si)	rw(30Si/29Si)		29Si/cps	30Si/cps	rbx(30Si/29Si)		29Si/cps	30Si/cps	rx(30Si/29Si)		/g		/g		/g		/g		/g		/g
		2013.09.18	Procedure blank	9243.6	5100.4			100835	5818.4	3074.5				103510	6740.4			89536.4	7221.9	7475.7				86641	5524.6	9658.2				3879.97	2605.91			3442.9	2378.1
			Sample solution	4.30995e+06	1.98498e+07	4.61429		511300	2.39213e+07	64478.3	0.0171631	0.00256753		1.98884e+07	4.18071e+06	4.74005		225616	96788.5	2.42407e+07	1.51931	270.561		2.47075e+07	1.28119e+06	850528	19.3003	0.659159		100685	640821	6.59276		240280	7662.44	0.0223122		0.000899712		0.000780727		0.00503489		0.00431415		1.19923e-05		0.040854
				29Si/cps	30Si/cps	rb1(30Si/29Si)		28Si/cps	29Si/cps	30Si/cps	rZ,28(28Si/29Si)	rZ(30Si/29Si)		28Si/cps	29Si/cps	rb2(28Si/29Si)		28Si/cps	29Si/cps	30Si/cps	ry,28(28Si/29Si)	ry(30Si/29Si)		28Si/cps	29Si/cps	30Si/cps	rw,28(28Si/29Si)	rw(30Si/29Si)		29Si/cps	30Si/cps	rbx(30Si/29Si)		29Si/cps	30Si/cps	rx(30Si/29Si)		/g		/g		/g		/g		/g		/g
		2013.09.18	Procedure blank	8693.7	2925.6			100835	5818.4	3074.5				108065	4845			89536.4	7221.9	7475.7				86641	5524.6	9658.2				3879.97	2605.91			3442.9	2378.1
			Sample solution	1.28013e+07	1.15711e+07	0.904291		511300	2.39213e+07	64478.3	0.0171631	0.00256753		1.15942e+07	1.2303e+07	0.933966		225616	96788.5	2.42407e+07	1.51931	270.561		2.47075e+07	1.28119e+06	850528	19.3003	0.659159		100685	640821	6.59276		240280	7662.44	0.0223122		0.00301405		0.00240794		0.00240058		0.00277166		1.19923e-05		0.040854
				29Si/cps	30Si/cps	rb1(30Si/29Si)		28Si/cps	29Si/cps	30Si/cps	rZ,28(28Si/29Si)	rZ(30Si/29Si)		28Si/cps	29Si/cps	rb2(28Si/29Si)		28Si/cps	29Si/cps	30Si/cps	ry,28(28Si/29Si)	ry(30Si/29Si)		28Si/cps	29Si/cps	30Si/cps	rw,28(28Si/29Si)	rw(30Si/29Si)		29Si/cps	30Si/cps	rbx(30Si/29Si)		29Si/cps	30Si/cps	rx(30Si/29Si)		/g		/g		/g		/g		/g		/g
		2013.06.08	Procedure blank	5916.88	6775.65			53715.3	2667.96	1748.47				38007.5	6003.76			44708.6	8281.71	1591.1				42713.6	4745.78	6651.64				1779.09	1334.85			1602.94	1287.22
			Sample solution	3989233	1.85115e+07	4.64555		450410	2.32708e+07	63981	0.0170488	0.00267458		1.92676e+07	4.06402e+06	4.73867		165208	84298.9	2.06501e+07	1.58516	271.629		2.43615e+07	1.29333e+06	863392	18.8726	0.664872		105695	686181	6.5904		261143	7679.92	0.0246309		0.000899712		0.000780727		0.00503489		0.00431415		1.19923e-05		0.040854
				29Si/cps	30Si/cps	rb1(30Si/29Si)		28Si/cps	29Si/cps	30Si/cps	rZ,28(28Si/29Si)	rZ(30Si/29Si)		28Si/cps	29Si/cps	rb2(28Si/29Si)		28Si/cps	29Si/cps	30Si/cps	ry,28(28Si/29Si)	ry(30Si/29Si)		28Si/cps	29Si/cps	30Si/cps	rw,28(28Si/29Si)	rw(30Si/29Si)		29Si/cps	30Si/cps	rbx(30Si/29Si)		29Si/cps	30Si/cps	rx(30Si/29Si)		/g		/g		/g		/g		/g		/g
		2013.06.08	Procedure blank	5883.45	4978.24			53715.3	2667.96	1748.47				36431.5	6292.49			44708.6	8281.71	1591.1				42713.6	4745.78	6651.64				1779.09	1334.85			1602.94	1287.22
			Sample solution	7.89864e+06	1.45444e+07	1.84212		450410	2.32708e+07	63981	0.0170488	0.00267458		1.72789e+06	922901	1.84535		165208	84298.9	2.06501e+07	1.58516	271.629		2.43615e+07	1.29333e+06	863392	18.8726	0.664872		105695	686181	6.5904		261143	7679.92	0.0246309		0.00160125		0.00168067		0.0035947		0.00301031		1.19923e-05		0.040854
				29Si/cps	30Si/cps	rb1(30Si/29Si)		28Si/cps	29Si/cps	30Si/cps	rZ,28(28Si/29Si)	rZ(30Si/29Si)		28Si/cps	29Si/cps	rb2(28Si/29Si)		28Si/cps	29Si/cps	30Si/cps	ry,28(28Si/29Si)	ry(30Si/29Si)		28Si/cps	29Si/cps	30Si/cps	rw,28(28Si/29Si)	rw(30Si/29Si)		29Si/cps	30Si/cps	rbx(30Si/29Si)		29Si/cps	30Si/cps	rx(30Si/29Si)		/g		/g		/g		/g		/g		/g
		2013.06.08	Procedure blank	3230.89	3132.75			53715.3	2667.96	1748.47				28641.1	6180.4			44708.6	8281.71	1591.1				42713.6	4745.78	6651.64				1779.09	1334.85			1602.94	1287.22
			Sample solution	1.19978e+07	1.09035e+07	0.908776		450410	2.32708e+07	63981	0.0170488	0.00267458		1.13509e+07	1.21461e+07	0.932647		165208	84298.9	2.06501e+07	1.58516	271.629		2.43615e+07	1.29333e+06	863392	18.8726	0.664872		105695	686181	6.5904		261143	7679.92	0.0246309		0.00301405		0.00240794		0.00240058		0.00277166		1.19923e-05		0.040854
				29Si/cps	30Si/cps	rb1(30Si/29Si)		28Si/cps	29Si/cps	30Si/cps	rZ,28(28Si/29Si)	rZ(30Si/29Si)		28Si/cps	29Si/cps	rb2(28Si/29Si)		28Si/cps	29Si/cps	30Si/cps	ry,28(28Si/29Si)	ry(30Si/29Si)		28Si/cps	29Si/cps	30Si/cps	rw,28(28Si/29Si)	rw(30Si/29Si)		29Si/cps	30Si/cps	rbx(30Si/29Si)		29Si/cps	30Si/cps	rx(30Si/29Si)		/g		/g		/g		/g		/g		/g
		2013.04.11	Procedure blank	7497.16	10023.2			35187.1	1473.74	973.68				32754.9	9182.17			27697.6	9417.6	759.35				29627.3	2607.62	6243.39				848.81	620.97			1760.85	1270.99
			Sample solution	3.32613e+06	1.50322e+07	4.52662		221499	9.14006e+06	24588.7	0.0203874	0.0025841		1.44486e+07	2.58658e+06	5.59316		150904	75229.8	1.80502e+07	1.87209	274.257		2.21099e+07	989587	654033	22.3716	0.656335		25623.6	159668	6.41969		165480	5169.18	0.0238102		0.000899712		0.000780727		0.00503489		0.00431415		1.19923e-05		0.040854
				29Si/cps	30Si/cps	rb1(30Si/29Si)		28Si/cps	29Si/cps	30Si/cps	rZ,28(28Si/29Si)	rZ(30Si/29Si)		28Si/cps	29Si/cps	rb2(28Si/29Si)		28Si/cps	29Si/cps	30Si/cps	ry,28(28Si/29Si)	ry(30Si/29Si)		28Si/cps	29Si/cps	30Si/cps	rw,28(28Si/29Si)	rw(30Si/29Si)		29Si/cps	30Si/cps	rbx(30Si/29Si)		29Si/cps	30Si/cps	rx(30Si/29Si)		/g		/g		/g		/g		/g		/g
		2013.04.11	Procedure blank	6971.74	6755.68			35187.1	1473.74	973.68				30077.4	9346.48			27697.6	9417.6	759.35				29627.3	2607.62	6243.39				848.81	620.97			1760.85	1270.99
			Sample solution	6.66936e+06	1.19962e+07	1.79958		221499	9.14006e+06	24588.7	0.0203874	0.0025841		1.62339e+07	7.28384e+06	2.22749		150904	75229.8	1.80502e+07	1.87209	274.257		2.21099e+07	989587	654033	22.3716	0.656335		25623.6	159668	6.41969		165480	5169.18	0.0238102		0.00160125		0.00168067		0.0035947		0.00301031		1.19923e-05		0.040854
				29Si/cps	30Si/cps	rb1(30Si/29Si)		28Si/cps	29Si/cps	30Si/cps	rZ,28(28Si/29Si)	rZ(30Si/29Si)		28Si/cps	29Si/cps	rb2(28Si/29Si)		28Si/cps	29Si/cps	30Si/cps	ry,28(28Si/29Si)	ry(30Si/29Si)		28Si/cps	29Si/cps	30Si/cps	rw,28(28Si/29Si)	rw(30Si/29Si)		29Si/cps	30Si/cps	rbx(30Si/29Si)		29Si/cps	30Si/cps	rx(30Si/29Si)		/g		/g		/g		/g		/g		/g
		2013.04.11	Procedure blank	2107.94	3545.15			35187.1	1473.74	973.68				29046.8	4045.41			27697.6	9417.6	759.35				29627.3	2607.62	6243.39				848.81	620.97			1760.85	1270.99
			Sample solution	9.67471e+06	8.54067e+06	0.882608		221499	9.14006e+06	24588.7	0.0203874	0.0025841		1.12346e+07	1.01801e+07	1.10118		150904	75229.8	1.80502e+07	1.87209	274.257		2.21099e+07	989587	654033	22.3716	0.656335		25623.6	159668	6.41969		165480	5169.18	0.0238102		0.00301405		0.00240794		0.00240058		0.00277166		1.19923e-05		0.040854
				Measured Quantities
	Sample	Date		YZ				Z						WZ				Y						W						YX				X				mZ1		mZ2		mw2		my1		myx		mx
				29Si/cps	30Si/cps	rb1(30Si/29Si)		28Si/cps	29Si/cps	30Si/cps	rZ,28(28Si/29Si)	rZ(30Si/29Si)		28Si/cps	29Si/cps	rb2(28Si/29Si)		28Si/cps	29Si/cps	30Si/cps	ry,28(28Si/29Si)	ry(30Si/29Si)		28Si/cps	29Si/cps	30Si/cps	rw,28(28Si/29Si)	rw(30Si/29Si)		29Si/cps	30Si/cps	rbx(30Si/29Si)		29Si/cps	30Si/cps	rx(30Si/29Si)		/g		/g		/g		/g		/g		/g
		2013.09.16	Procedure blank	6278.9	3451.7			69135.5	4337.2	2365.6				67207.7	4487.5			59898	5275.81	4890.53				59751.8	4459.5	5709.65				3349.3	2247.4			2855.88	1918.55
			Sample solution	2.8666e+06	1.32619e+07	4.63529		330807	1.51314e+07	41336.7	0.0172982	0.00257625		1.43995e+07	3.03464e+06	4.72989		151355	62034.4	1.53379e+07	1.61133	270.145		1.5511e+07	798538	532196	19.4581	0.663015		118866	759091	6.55182		305840	8792.3	0.0226869		0.000899712		0.000780727		0.00503489		0.00431415		1.19593e-05		0.0410462
				29Si/cps	30Si/cps	rb1(30Si/29Si)		28Si/cps	29Si/cps	30Si/cps	rZ,28(28Si/29Si)	rZ(30Si/29Si)		28Si/cps	29Si/cps	rb2(28Si/29Si)		28Si/cps	29Si/cps	30Si/cps	ry,28(28Si/29Si)	ry(30Si/29Si)		28Si/cps	29Si/cps	30Si/cps	rw,28(28Si/29Si)	rw(30Si/29Si)		29Si/cps	30Si/cps	rbx(30Si/29Si)		29Si/cps	30Si/cps	rx(30Si/29Si)		/g		/g		/g		/g		/g		/g
		2013.09.16	Procedure blank	6332.4	2151			69135.5	4337.2	2365.6				73502.4	3745.3			59898	5275.81	4890.53				59751.8	4459.5	5709.65				3349.3	2247.4			2855.88	1918.55
			Sample solution	9.67715e+06	8.76183e+06	0.905785		330807	1.51314e+07	41336.7	0.0172982	0.00257625		6.74271e+06	7.15015e+06	0.933226		151355	62034.4	1.53379e+07	1.61133	270.145		1.5511e+07	798538	532196	19.4581	0.663015		118866	759091	6.55182		305840	8792.3	0.0226869		0.00301405		0.00240794		0.00240058		0.00277166		1.19593e-05		0.0410462
				29Si/cps	30Si/cps	rb1(30Si/29Si)		28Si/cps	29Si/cps	30Si/cps	rZ,28(28Si/29Si)	rZ(30Si/29Si)		28Si/cps	29Si/cps	rb2(28Si/29Si)		28Si/cps	29Si/cps	30Si/cps	ry,28(28Si/29Si)	ry(30Si/29Si)		28Si/cps	29Si/cps	30Si/cps	rw,28(28Si/29Si)	rw(30Si/29Si)		29Si/cps	30Si/cps	rbx(30Si/29Si)		29Si/cps	30Si/cps	rx(30Si/29Si)		/g		/g		/g		/g		/g		/g
		2013.06.08	Procedure blank	5916.88	6775.65			53715.3	2667.96	1748.47				38007.5	6003.76			44708.6	8281.71	1591.1				42713.6	4745.78	6651.64				1939.01	1407.23			1223.21	1021.22
			Sample solution	3989233	1.85115e+07	4.64555		450410	2.32708e+07	63981	0.0170488	0.00267458		1.92676e+07	4.06402e+06	4.73867		165208	84298.9	2.06501e+07	1.58516	271.629		2.43615e+07	1.29333e+06	863392	18.8726	0.664872		105354	681804	6.57926		239835	6895.77	0.0246197		0.000899712		0.000780727		0.00503489		0.00431415		1.19593e-05		0.0410462
				29Si/cps	30Si/cps	rb1(30Si/29Si)		28Si/cps	29Si/cps	30Si/cps	rZ,28(28Si/29Si)	rZ(30Si/29Si)		28Si/cps	29Si/cps	rb2(28Si/29Si)		28Si/cps	29Si/cps	30Si/cps	ry,28(28Si/29Si)	ry(30Si/29Si)		28Si/cps	29Si/cps	30Si/cps	rw,28(28Si/29Si)	rw(30Si/29Si)		29Si/cps	30Si/cps	rbx(30Si/29Si)		29Si/cps	30Si/cps	rx(30Si/29Si)		/g		/g		/g		/g		/g		/g
		2013.06.08	Procedure blank	5883.45	4978.24			53715.3	2667.96	1748.47				36431.5	6292.49			44708.6	8281.71	1591.1				42713.6	4745.78	6651.64				1939.01	1407.23			1223.21	1021.22
			Sample solution	7.89864e+06	1.45444e+07	1.84212		450410	2.32708e+07	63981	0.0170488	0.00267458		1.72789e+06	922901	1.84535		165208	84298.9	2.06501e+07	1.58516	271.629		2.43615e+07	1.29333e+06	863392	18.8726	0.664872		105354	681804	6.57926		239835	6895.77	0.0246197		0.00160125		0.00168067		0.0035947		0.00301031		1.19593e-05		0.0410462
				29Si/cps	30Si/cps	rb1(30Si/29Si)		28Si/cps	29Si/cps	30Si/cps	rZ,28(28Si/29Si)	rZ(30Si/29Si)		28Si/cps	29Si/cps	rb2(28Si/29Si)		28Si/cps	29Si/cps	30Si/cps	ry,28(28Si/29Si)	ry(30Si/29Si)		28Si/cps	29Si/cps	30Si/cps	rw,28(28Si/29Si)	rw(30Si/29Si)		29Si/cps	30Si/cps	rbx(30Si/29Si)		29Si/cps	30Si/cps	rx(30Si/29Si)		/g		/g		/g		/g		/g		/g
		2013.06.08	Procedure blank	3230.89	3132.75			53715.3	2667.96	1748.47				28641.1	6180.4			44708.6	8281.71	1591.1				42713.6	4745.78	6651.64				1939.01	1407.23			1223.21	1021.22
			Sample solution	1.19978e+07	1.09035e+07	0.908776		450410	2.32708e+07	63981	0.0170488	0.00267458		1.13509e+07	1.21461e+07	0.932647		165208	84298.9	2.06501e+07	1.58516	271.629		2.43615e+07	1.29333e+06	863392	18.8726	0.664872		105354	681804	6.57926		239835	6895.77	0.0246197		0.00301405		0.00240794		0.00240058		0.00277166		1.19593e-05		0.0410462
				29Si/cps	30Si/cps	rb1(30Si/29Si)		28Si/cps	29Si/cps	30Si/cps	rZ,28(28Si/29Si)	rZ(30Si/29Si)		28Si/cps	29Si/cps	rb2(28Si/29Si)		28Si/cps	29Si/cps	30Si/cps	ry,28(28Si/29Si)	ry(30Si/29Si)		28Si/cps	29Si/cps	30Si/cps	rw,28(28Si/29Si)	rw(30Si/29Si)		29Si/cps	30Si/cps	rbx(30Si/29Si)		29Si/cps	30Si/cps	rx(30Si/29Si)		/g		/g		/g		/g		/g		/g
		2013.04.11	Procedure blank	7497.16	10023.2			35187.1	1473.74	973.68				32754.9	9182.17			27697.6	9417.6	759.35				29627.3	2607.62	6243.39				817.13	566.41			1645.96	1332.25
			Sample solution	3.32613e+06	1.50322e+07	4.52662		221499	9.14006e+06	24588.7	0.0203874	0.0025841		1.44486e+07	2.58658e+06	5.59316		150904	75229.8	1.80502e+07	1.87209	274.257		2.21099e+07	989587	654033	22.3716	0.656335		32203	202396	6.43061		158303	5228.62	0.0248719		0.000899712		0.000780727		0.00503489		0.00431415		1.19593e-05		0.0410462
				29Si/cps	30Si/cps	rb1(30Si/29Si)		28Si/cps	29Si/cps	30Si/cps	rZ,28(28Si/29Si)	rZ(30Si/29Si)		28Si/cps	29Si/cps	rb2(28Si/29Si)		28Si/cps	29Si/cps	30Si/cps	ry,28(28Si/29Si)	ry(30Si/29Si)		28Si/cps	29Si/cps	30Si/cps	rw,28(28Si/29Si)	rw(30Si/29Si)		29Si/cps	30Si/cps	rbx(30Si/29Si)		29Si/cps	30Si/cps	rx(30Si/29Si)		/g		/g		/g		/g		/g		/g
		2013.04.11	Procedure blank	6971.74	6755.68			35187.1	1473.74	973.68				30077.4	9346.48			27697.6	9417.6	759.35				29627.3	2607.62	6243.39				817.13	566.41			1645.96	1332.25
			Sample solution	6.66936e+06	1.19962e+07	1.79958		221499	9.14006e+06	24588.7	0.0203874	0.0025841		1.62339e+07	7.28384e+06	2.22749		150904	75229.8	1.80502e+07	1.87209	274.257		2.21099e+07	989587	654033	22.3716	0.656335		32203	202396	6.43061		158303	5228.62	0.0248719		0.00160125		0.00168067		0.0035947		0.00301031		1.19593e-05		0.0410462
				29Si/cps	30Si/cps	rb1(30Si/29Si)		28Si/cps	29Si/cps	30Si/cps	rZ,28(28Si/29Si)	rZ(30Si/29Si)		28Si/cps	29Si/cps	rb2(28Si/29Si)		28Si/cps	29Si/cps	30Si/cps	ry,28(28Si/29Si)	ry(30Si/29Si)		28Si/cps	29Si/cps	30Si/cps	rw,28(28Si/29Si)	rw(30Si/29Si)		29Si/cps	30Si/cps	rbx(30Si/29Si)		29Si/cps	30Si/cps	rx(30Si/29Si)		/g		/g		/g		/g		/g		/g
		2013.04.11	Procedure blank	2107.94	3545.15			35187.1	1473.74	973.68				29046.8	4045.41			27697.6	9417.6	759.35				29627.3	2607.62	6243.39				817.13	566.41			1645.96	1332.25
			Sample solution	9.67471e+06	8.54067e+06	0.882608		221499	9.14006e+06	24588.7	0.0203874	0.0025841		1.12346e+07	1.01801e+07	1.10118		150904	75229.8	1.80502e+07	1.87209	274.257		2.21099e+07	989587	654033	22.3716	0.656335		32203	202396	6.43061		158303	5228.62	0.0248719		0.00301405		0.00240794		0.00240058		0.00277166		1.19593e-05		0.0410462
				Measured Quantities
	Sample	Date		YZ				Z						WZ				Y						W						YX				X				mZ1		mZ2		mw2		my1		myx		mx
				29Si/cps	30Si/cps	rb1(30Si/29Si)		28Si/cps	29Si/cps	30Si/cps	rZ,28(28Si/29Si)	rZ(30Si/29Si)		28Si/cps	29Si/cps	rb2(28Si/29Si)		28Si/cps	29Si/cps	30Si/cps	ry,28(28Si/29Si)	ry(30Si/29Si)		28Si/cps	29Si/cps	30Si/cps	rw,28(28Si/29Si)	rw(30Si/29Si)		29Si/cps	30Si/cps	rbx(30Si/29Si)		29Si/cps	30Si/cps	rx(30Si/29Si)		/g		/g		/g		/g		/g		/g
		2014.06.24	Procedure blank	15048.1	1336.4			147846	9761.4	2793.5				117129	2378.8			99088	16457.2	7744.3				99995.7	9871	14865.6				4042.8	3064.2			1217	848.7
			Sample solution	1.50251e+07	1.36832e+07	0.911514		578925	2.82361e+07	74770.2	0.0152722	0.00254998		1.35657e+07	1.47125e+07	0.91424		297432	118303	2.88529e+07	1.94748	283.223		2.65303e+07	1.36275e+06	930016	19.5364	0.676448		296904	1.9283e+06	6.57389		340061	9781	0.0263611		0.00301405		0.00240794		0.00240058		0.00277166		1.19198e-05		0.0412501
				29Si/cps	30Si/cps	rb1(30Si/29Si)		28Si/cps	29Si/cps	30Si/cps	rZ,28(28Si/29Si)	rZ(30Si/29Si)		28Si/cps	29Si/cps	rb2(28Si/29Si)		28Si/cps	29Si/cps	30Si/cps	ry,28(28Si/29Si)	ry(30Si/29Si)		28Si/cps	29Si/cps	30Si/cps	rw,28(28Si/29Si)	rw(30Si/29Si)		29Si/cps	30Si/cps	rbx(30Si/29Si)		29Si/cps	30Si/cps	rx(30Si/29Si)		/g		/g		/g		/g		/g		/g
		2013.09.17	Procedure blank	9401.9	4949.1			93183.8	6051.1	3202				97527.1	6885.8			81228.4	7347.2	7999.7				79743.7	5443.7	10007.6				5062.1	5674.6			4249	3019.8
			Sample solution	4.43222e+06	2.05945e+07	4.65531		514848	2.46654e+07	67364.6	0.0170996	0.00260196		2.01785e+07	4.25974e+06	4.72176		224508	97508.7	2.47768e+07	1.58914	274.716		2.42799e+07	1.26895e+06	851816	19.1532	0.666251		115959	736178	6.58726		368558	11792.6	0.0240808		0.000899712		0.000780727		0.00503489		0.00431415		1.19198e-05		0.0412501
				29Si/cps	30Si/cps	rb1(30Si/29Si)		28Si/cps	29Si/cps	30Si/cps	rZ,28(28Si/29Si)	rZ(30Si/29Si)		28Si/cps	29Si/cps	rb2(28Si/29Si)		28Si/cps	29Si/cps	30Si/cps	ry,28(28Si/29Si)	ry(30Si/29Si)		28Si/cps	29Si/cps	30Si/cps	rw,28(28Si/29Si)	rw(30Si/29Si)		29Si/cps	30Si/cps	rbx(30Si/29Si)		29Si/cps	30Si/cps	rx(30Si/29Si)		/g		/g		/g		/g		/g		/g
		2013.09.17	Procedure blank	11308.5	3020.1			93183.8	6051.1	3202				103573	5241.1			81228.4	7347.2	7999.7				79743.7	5443.7	10007.6				5062.1	5674.6			4249	3019.8
			Sample solution	1.32059e+07	1.20157e+07	0.910423		514848	2.46654e+07	67364.6	0.0170996	0.00260196		1.18928e+07	1.26558e+07	0.931914		224508	97508.7	2.47768e+07	1.58914	274.716		2.42799e+07	1.26895e+06	851816	19.1532	0.666251		115959	736178	6.58726		368558	11792.6	0.0240808		0.00301405		0.00240794		0.00240058		0.00277166		1.19198e-05		0.0412501
				29Si/cps	30Si/cps	rb1(30Si/29Si)		28Si/cps	29Si/cps	30Si/cps	rZ,28(28Si/29Si)	rZ(30Si/29Si)		28Si/cps	29Si/cps	rb2(28Si/29Si)		28Si/cps	29Si/cps	30Si/cps	ry,28(28Si/29Si)	ry(30Si/29Si)		28Si/cps	29Si/cps	30Si/cps	rw,28(28Si/29Si)	rw(30Si/29Si)		29Si/cps	30Si/cps	rbx(30Si/29Si)		29Si/cps	30Si/cps	rx(30Si/29Si)		/g		/g		/g		/g		/g		/g
		2013.06.08	Procedure blank	5916.88	6775.65			53715.3	2667.96	1748.47				38007.5	6003.76			44708.6	8281.71	1591.1				42713.6	4745.78	6651.64				1964.47	1434.34			1435	1152.55
			Sample solution	3989233	1.85115e+07	4.64555		450410	2.32708e+07	63981	0.0170488	0.00267458		1.92676e+07	4.06402e+06	4.73867		165208	84298.9	2.06501e+07	1.58516	271.629		2.43615e+07	1.29333e+06	863392	18.8726	0.664872		109633	699816	6.48643		247597	7233.23	0.024702		0.000899712		0.000780727		0.00503489		0.00431415		1.19198e-05		0.0412501
				29Si/cps	30Si/cps	rb1(30Si/29Si)		28Si/cps	29Si/cps	30Si/cps	rZ,28(28Si/29Si)	rZ(30Si/29Si)		28Si/cps	29Si/cps	rb2(28Si/29Si)		28Si/cps	29Si/cps	30Si/cps	ry,28(28Si/29Si)	ry(30Si/29Si)		28Si/cps	29Si/cps	30Si/cps	rw,28(28Si/29Si)	rw(30Si/29Si)		29Si/cps	30Si/cps	rbx(30Si/29Si)		29Si/cps	30Si/cps	rx(30Si/29Si)		/g		/g		/g		/g		/g		/g
		2013.06.08	Procedure blank	5883.45	4978.24			53715.3	2667.96	1748.47				36431.5	6292.49			44708.6	8281.71	1591.1				42713.6	4745.78	6651.64				1964.47	1434.34			1435	1152.55
			Sample solution	7.89864e+06	1.45444e+07	1.84212		450410	2.32708e+07	63981	0.0170488	0.00267458		1.72789e+06	922901	1.84535		165208	84298.9	2.06501e+07	1.58516	271.629		2.43615e+07	1.29333e+06	863392	18.8726	0.664872		109633	699816	6.48643		247597	7233.23	0.024702		0.00160125		0.00168067		0.0035947		0.00301031		1.19198e-05		0.0412501
				29Si/cps	30Si/cps	rb1(30Si/29Si)		28Si/cps	29Si/cps	30Si/cps	rZ,28(28Si/29Si)	rZ(30Si/29Si)		28Si/cps	29Si/cps	rb2(28Si/29Si)		28Si/cps	29Si/cps	30Si/cps	ry,28(28Si/29Si)	ry(30Si/29Si)		28Si/cps	29Si/cps	30Si/cps	rw,28(28Si/29Si)	rw(30Si/29Si)		29Si/cps	30Si/cps	rbx(30Si/29Si)		29Si/cps	30Si/cps	rx(30Si/29Si)		/g		/g		/g		/g		/g		/g
		2013.06.08	Procedure blank	3230.89	3132.75			53715.3	2667.96	1748.47				28641.1	6180.4			44708.6	8281.71	1591.1				42713.6	4745.78	6651.64				1964.47	1434.34			1435	1152.55
			Sample solution	1.19978e+07	1.09035e+07	0.908776		450410	2.32708e+07	63981	0.0170488	0.00267458		1.13509e+07	1.21461e+07	0.932647		165208	84298.9	2.06501e+07	1.58516	271.629		2.43615e+07	1.29333e+06	863392	18.8726	0.664872		109633	699816	6.48643		247597	7233.23	0.024702		0.00301405		0.00240794		0.00240058		0.00277166		1.19198e-05		0.0412501
				29Si/cps	30Si/cps	rb1(30Si/29Si)		28Si/cps	29Si/cps	30Si/cps	rZ,28(28Si/29Si)	rZ(30Si/29Si)		28Si/cps	29Si/cps	rb2(28Si/29Si)		28Si/cps	29Si/cps	30Si/cps	ry,28(28Si/29Si)	ry(30Si/29Si)		28Si/cps	29Si/cps	30Si/cps	rw,28(28Si/29Si)	rw(30Si/29Si)		29Si/cps	30Si/cps	rbx(30Si/29Si)		29Si/cps	30Si/cps	rx(30Si/29Si)		/g		/g		/g		/g		/g		/g
		2013.04.11	Procedure blank	7497.16	10023.2			35187.1	1473.74	973.68				32754.9	9182.17			27697.6	9417.6	759.35				29627.3	2607.62	6243.39				823.19	574.11			1690.36	1171.81
			Sample solution	3.32613e+06	1.50322e+07	4.52662		221499	9.14006e+06	24588.7	0.0203874	0.0025841		1.44486e+07	2.58658e+06	5.59316		150904	75229.8	1.80502e+07	1.87209	274.257		2.21099e+07	989587	654033	22.3716	0.656335		32932.7	205543	6.38342		154370	4936.56	0.0246578		0.000899712		0.000780727		0.00503489		0.00431415		1.19198e-05		0.0412501
				29Si/cps	30Si/cps	rb1(30Si/29Si)		28Si/cps	29Si/cps	30Si/cps	rZ,28(28Si/29Si)	rZ(30Si/29Si)		28Si/cps	29Si/cps	rb2(28Si/29Si)		28Si/cps	29Si/cps	30Si/cps	ry,28(28Si/29Si)	ry(30Si/29Si)		28Si/cps	29Si/cps	30Si/cps	rw,28(28Si/29Si)	rw(30Si/29Si)		29Si/cps	30Si/cps	rbx(30Si/29Si)		29Si/cps	30Si/cps	rx(30Si/29Si)		/g		/g		/g		/g		/g		/g
		2013.04.11	Procedure blank	6971.74	6755.68			35187.1	1473.74	973.68				30077.4	9346.48			27697.6	9417.6	759.35				29627.3	2607.62	6243.39				823.19	574.11			1690.36	1171.81
			Sample solution	6.66936e+06	1.19962e+07	1.79958		221499	9.14006e+06	24588.7	0.0203874	0.0025841		1.62339e+07	7.28384e+06	2.22749		150904	75229.8	1.80502e+07	1.87209	274.257		2.21099e+07	989587	654033	22.3716	0.656335		32932.7	205543	6.38342		154370	4936.56	0.0246578		0.00160125		0.00168067		0.0035947		0.00301031		1.19198e-05		0.0412501
				29Si/cps	30Si/cps	rb1(30Si/29Si)		28Si/cps	29Si/cps	30Si/cps	rZ,28(28Si/29Si)	rZ(30Si/29Si)		28Si/cps	29Si/cps	rb2(28Si/29Si)		28Si/cps	29Si/cps	30Si/cps	ry,28(28Si/29Si)	ry(30Si/29Si)		28Si/cps	29Si/cps	30Si/cps	rw,28(28Si/29Si)	rw(30Si/29Si)		29Si/cps	30Si/cps	rbx(30Si/29Si)		29Si/cps	30Si/cps	rx(30Si/29Si)		/g		/g		/g		/g		/g		/g
		2013.04.11	Procedure blank	2107.94	3545.15			35187.1	1473.74	973.68				29046.8	4045.41			27697.6	9417.6	759.35				29627.3	2607.62	6243.39				823.19	574.11			1690.36	1171.81
			Sample solution	9.67471e+06	8.54067e+06	0.882608		221499	9.14006e+06	24588.7	0.0203874	0.0025841		1.12346e+07	1.01801e+07	1.10118		150904	75229.8	1.80502e+07	1.87209	274.257		2.21099e+07	989587	654033	22.3716	0.656335		32932.7	205543	6.38342		154370	4936.56	0.0246578		0.00301405		0.00240794		0.00240058		0.00277166		1.19198e-05		0.0412501
[truncated: 1 more columns]
